# Supplementary material for: A Comprehensive Reference Transcriptome Resource for the Common House Spider Parasteatoda tepidariorum
Source: PubMed Central journal article supplement (PMC4132015; doi:10.1371/journal.pone.0104885), 2014-08-13
Supplement: pone.0104885.s004.pdf [file pone.0104885.s004.pdf]

| Species                                    | Order      | Resource                | Tissue Origin                                           | # reads       | # bp            | # contigs/transcripts/<br>unigenes/gene models | References |
|--------------------------------------------|------------|-------------------------|---------------------------------------------------------|---------------|-----------------|------------------------------------------------|------------|
| <i>Limulus polyphemus</i>                  | Xiphosura  | genome                  | adult third walking leg, larvae                         | 1,700,000,000 | N/A             | N/A                                            | [1]        |
| <i>Rhipicephalus (Boophilus) microplus</i> | Acari      | BAC library             | N/A                                                     | 3,072         | 136,474,000     | 24                                             | [2]        |
| <i>Rhipicephalus (Boophilus) microplus</i> | Acari      | EST library             | eggs, larvae, nymphs, adults, dissected adult organs    | 42,512        | N/A             | 13,643                                         | [3,4]      |
| <i>Rhipicephalus appendiculatus</i>        | Acari      | EST library             | salivary gland                                          | 18,422        | 626,000         | 7,359                                          | [5]        |
| <i>Ixodes scapularis</i>                   | Acari      | genome                  | N/A                                                     | N/A           | 1,388,472,180   | 24,925                                         | [6,7]      |
| <i>Tetranychus urticae</i>                 | Acari      | genome                  | embryos                                                 | N/A           | ~10,000,000,000 | 18,414                                         | [8]        |
| <i>Mesobuthus martensii</i>                | Scorpiones | BAC library             | male testis                                             | 46,080        | 46,080,000,000  | N/A                                            | [9]        |
| <i>Mesobuthus martensii</i>                | Scorpiones | genome                  | male adult muscle tissues of the pedipalp and metasoma  | 1,634,795,503 | 1,128,500,000   | 32,016                                         | [10]       |
| <i>Loxosceles laeta</i>                    | Araneae    | EST library             | venom gland                                             | 3,008         | N/A             | 1,357                                          | [11]       |
| <i>Citharischius crawshayi</i>             | Araneae    | EST library             | venom gland                                             | 282           | N/A             | 44                                             | [12]       |
| <i>Acanthoscurria gomesiana</i>            | Araneae    | EST library             | hemocytes                                               | 7,584         | N/A             | 3,723                                          | [13]       |
| <i>Aphonopelma sp.</i>                     | Araneae    | EST library             | leg muscles of adults                                   | 2,507         | N/A             | 305                                            | [14]       |
| <i>Chilobrachys jingzhao</i>               | Araneae    | EST library             | venom gland                                             | 788           | N/A             | 356                                            | [15]       |
| <i>Ornithoctonus huwena</i>                | Araneae    | EST library             | venom gland                                             | 468           | N/A             | 89                                             | [16]       |
| <i>Lycosa singoriensis</i>                 | Araneae    | EST library             | venom gland                                             | 833           | N/A             | 331                                            | [17]       |
| <i>Dolomedes mizhoanus</i>                 | Araneae    | EST library             | venom gland                                             | 356           | N/A             | N/A                                            | [18]       |
| <i>Gasteracantha cancriformis</i>          | Araneae    | 454 Transcriptome       | spinning gland of adult females                         | 52,399        | 14,339,651      | 25,663                                         | [19]       |
| <i>Actinopus spp.</i>                      | Araneae    | 454 Transcriptome       | spinning gland of adult females                         | 34,496        | 8,087,280       | 18,257                                         | [19]       |
| <i>Stegodyphus lineatus</i>                | Araneae    | 454 Transcriptome       | adult                                                   | 457675        | 165,220,675     | 8,944                                          | [20]       |
| <i>Stegodyphus tentoriicola</i>            | Araneae    | 454 Transcriptome       | adult                                                   | 459,994       | 157,317,948     | 6,094                                          | [20]       |
| <i>Stegodyphus mimosarum</i>               | Araneae    | 454 Transcriptome       | adult                                                   | 542,510       | 175,230,730     | 5,893                                          | [20]       |
| <i>Theridion grallator</i>                 | Araneae    | Illumina Transcriptome  | adult females                                           | 239,263,493   | N/A             | 104,481                                        | [21]       |
| <i>Theridion californicum</i>              | Araneae    | Illumina Transcriptome  | adult females                                           | 250,930,772   | N/A             | 128,391                                        | [21]       |
| <i>Trittame loki</i>                       | Araneae    | 454 Transcriptome       | female venom glands                                     | N/A           | N/A             | 4,711                                          | [22]       |
| <i>Latrodectus tredecimguttatus</i>        | Araneae    | Illumina Transcriptome  | venom glands                                            | 27,605,467    | 2,484,492,030   | 34,334                                         | [23]       |
| <i>Latrodectus hesperus</i>                | Araneae    | Illumina Tag sequencing | female major ampullate silk glands and cephalothorax    | 25,857,032    | N/A             | 200,603 unique tags                            | [24]       |
| <i>Latrodectus hesperus</i>                | Araneae    | Illumina Transcriptome  | silk glands, cephalothorax, seven pairs of venom glands | 149,000,000   | N/A             | 103,365                                        | [25]       |

|                                  |         |                          |                                          |                    |                       |                                 |                     |
|----------------------------------|---------|--------------------------|------------------------------------------|--------------------|-----------------------|---------------------------------|---------------------|
| <i>Gasteracantha arcuata</i>     | Araneae | Illumina Transcriptome   | adults                                   | 23,370,495         | 4,674,099,000         | 54,871                          | [26]                |
| <i>Nasoonaria sinensis</i>       | Araneae | Illumina Transcriptome   | adults                                   | 25,346,489         | 5,069,297,800         | 101,855                         | [26]                |
| <i>Gasteracantha hasselti</i>    | Araneae | Illumina Transcriptome   | adults                                   | 16,416,304         | 3,283,260,800         | 75,455                          | [26]                |
| <i>Stegodyphus mimosarum</i>     | Araneae | genome                   | adults                                   | N/A                | ~2,550,000,000        | 27,235                          | [27]                |
| <i>Acanthoscurria geniculata</i> | Araneae | genome                   | adults                                   | N/A                | ~6,000,000,000        | ~70,000                         | [27]                |
| <i>Parasteatoda tepidariorum</i> | Araneae | EST library              | embryos                                  | 24,360             | 16,537,059            | N/A                             | [28,29], this study |
| <i>Parasteatoda tepidariorum</i> | Araneae | 454 Transcriptome        | embryos (stages 1-13)                    | 1,040,006          | 639,294,706           | 21,959 isotigs                  | this study          |
| <i>Parasteatoda tepidariorum</i> | Araneae | Illumina Transcriptome   | embryos (stages 1-14)                    | 332,245,126        | 33,556,757,726        | N/A                             | this study          |
| <i>Parasteatoda tepidariorum</i> | Araneae | Illumina Transcriptome   | nymphs, larvae, adult female, adult male | 292,831,388        | 29,575,970,188        | N/A                             | this study          |
| <i>Parasteatoda tepidariorum</i> | Araneae | <b>Combined assembly</b> | <b>embryos, nymphs, larvae, adults</b>   | <b>625,219,691</b> | <b>61,839,406,064</b> | <b>41,766 unique BLAST hits</b> | this study          |

## References

1. Nossa CW, Havlak P, Yue J-X, Lv J, Vincent KY, et al. (2014) Joint assembly and genetic mapping of the Atlantic horseshoe crab genome reveals ancient whole genome duplication. *GigaScience* 3: 9. doi:10.1186/2047-217X-3-9.
2. Moolhuijzen PM, Lew-Tabor AE, Morgan JAT, Valle MR, Peterson DG, et al. (2011) The complexity of *Rhipicephalus (Boophilus) microplus* genome characterised through detailed analysis of two BAC clones. *BMC Res Notes* 4: 254. doi:10.1186/1756-0500-4-254.
3. Wang M, Guerrero FD, Pertea G, Nene VM (2007) Global comparative analysis of ESTs from the southern cattle tick, *Rhipicephalus (Boophilus) microplus*. *BMC Genomics* 8: 368. doi:10.1186/1471-2164-8-368.
4. Guerrero FD, Miller RJ, Rousseau M-E, Sunkara S, Quackenbush J, et al. (2005) BmiGI: a database of cDNAs expressed in *Boophilus microplus*, the tropical/southern cattle tick. *Insect Biochem Mol Biol* 35: 585–595. doi:10.1016/j.ibmb.2005.01.020.
5. Nene V, Lee D, Kang'a S, Skilton R, Shah T, et al. (2004) Genes transcribed in the salivary glands of female *Rhipicephalus appendiculatus* ticks infected with *Theileria parva*. *Insect Biochem Mol Biol* 34: 1117–1128. doi:10.1016/j.ibmb.2004.07.002.

6. Hill CA, Wikel SK (2005) The *Ixodes scapularis* Genome Project: an opportunity for advancing tick research. *Trends Parasitol* 21: 151–153. doi:10.1016/j.pt.2005.02.004.
7. Vectorbase (n.d.). Available: <http://www.vectorbase.org>.
8. Grbić M, Leeuwen TV, Clark RM, Rombauts S, Rouzé P, et al. (2011) The genome of *Tetranychus urticae* reveals herbivorous pest adaptations. *Nature* 479: 487–492. doi:10.1038/nature10640.
9. Li S, Ma Y, Jang S, Wu Y, Liu H, et al. (2009) A HindIII BAC library construction of *Mesobuthus martensii* Karsch (Scorpiones:Buthidae): An important genetic resource for comparative genomics and phylogenetic analysis. *Genes Genet Syst* 84: 417–424. doi:10.1266/ggs.84.417.
10. Cao Z, Yu Y, Wu Y, Hao P, Di Z, et al. (2013) The genome of *Mesobuthus martensii* reveals a unique adaptation model of arthropods. *Nat Commun* 4. Available: <http://www.nature.com/ncomms/2013/131015/ncomms3602/full/ncomms3602.html>. Accessed 12 November 2013.
11. Fernandes-Pedrosa M de F, Junqueira-de-Azevedo I de L, Gonçalves-de-Andrade RM, Kobashi LS, Almeida DD, et al. (2008) Transcriptome analysis of *Loxosceles laeta* (Araneae, Sicariidae) spider venomous gland using expressed sequence tags. *BMC Genomics* 9: 279. doi:10.1186/1471-2164-9-279.
12. Diego-García E, Peigneur S, Waelkens E, Debaveye S, Tytgat J (2010) Venom components from *Citharischius crawshayi* spider (Family Theraphosidae): exploring transcriptome, venomics, and function. *Cell Mol Life Sci* 67: 2799–2813. doi:10.1007/s00018-010-0359-x.
13. Lorenzini DM, Silva Jr PI da, Soares MB, Arruda P, Setubal J, et al. (2006) Discovery of immune-related genes expressed in hemocytes of the tarantula spider *Acanthoscurria gomesiana*. *Dev Comp Immunol* 30: 545–556. doi:10.1016/j.dci.2005.09.001.
14. Zhu J, Sun Y, Zhao F-Q, Yu J, Craig R, et al. (2009) Analysis of tarantula skeletal muscle protein sequences and identification of transcriptional isoforms. *BMC Genomics* 10: 117. doi:10.1186/1471-2164-10-117.
15. Chen J, Zhao L, Jiang L, Meng E, Zhang Y, et al. (2008) Transcriptome analysis revealed novel possible venom components and cellular processes of the tarantula *Chilobrachys jingzhao* venom gland. *Toxicon Off J Int Soc Toxinology* 52: 794–806. doi:10.1016/j.toxicon.2008.08.003.
16. Jiang L, Peng L, Chen J, Zhang Y, Xiong X, et al. (2008) Molecular diversification based on analysis of expressed sequence tags from the venom glands of the Chinese bird spider *Ornithoctonus huwena*. *Toxicon Off J Int Soc Toxinology* 51: 1479–1489. doi:10.1016/j.toxicon.2008.03.024.
17. Zhang Y, Chen J, Tang X, Wang F, Jiang L, et al. (2010) Transcriptome analysis of the venom glands of the Chinese wolf spider *Lycosa singoriensis*. *Zool Jena Ger* 113: 10–18. doi:10.1016/j.zool.2009.04.001.

18. Jiang L, Liu C, Duan Z, Deng M, Tang X, et al. (2013) Transcriptome analysis of venom glands from a single fishing spider *Dolomedes mizhoanus*. *Toxicon* 73: 23–32. doi:10.1016/j.toxicon.2013.07.005.
19. Prosdocimi F, Bittencourt D, da Silva FR, Kirst M, Motta PC, et al. (2011) Spinning Gland Transcriptomics from Two Main Clades of Spiders (Order: Araneae) - Insights on Their Molecular, Anatomical and Behavioral Evolution. *PLoS ONE* 6: e21634. doi:10.1371/journal.pone.0021634.
20. Mattila TM, Bechsgaard JS, Hansen TT, Schierup MH, Bilde T (2012) Orthologous genes identified by transcriptome sequencing in the spider genus *Stegodyphus*. *BMC Genomics* 13: 70. doi:10.1186/1471-2164-13-70.
21. Croucher PJ, Brewer MS, Winchell CJ, Oxford GS, Gillespie RG (2013) De novo characterization of the gene-rich transcriptomes of two color-polymorphic spiders, *Theridion grallator* and *T. californicum* (Araneae: Theridiidae), with special reference to pigment genes. *BMC Genomics* 14: 862. doi:10.1186/1471-2164-14-862.
22. Undheim EAB, Sunagar K, Herzig V, Kely L, Low DHW, et al. (2013) A Proteomics and Transcriptomics Investigation of the Venom from the Barychelid Spider *Trittame loki* (Brush-Foot Trapdoor). *Toxins* 5: 2488–2503. doi:10.3390/toxins5122488.
23. He Q, Duan Z, Yu Y, Liu Z, Liu Z, et al. (2013) The Venom Gland Transcriptome of *Latrodectus tredecimguttatus* Revealed by Deep Sequencing and cDNA Library Analysis. *PLoS ONE* 8: e81357. doi:10.1371/journal.pone.0081357.
24. Lane AK, Hayashi CY, Whitworth GB, Ayoub NA (2013) Complex gene expression in the dragline silk producing glands of the Western black widow (*Latrodectus hesperus*). *BMC Genomics* 14: 846. doi:10.1186/1471-2164-14-846.
25. Clarke TH, Garb JE, Hayashi CY, Haney RA, Lancaster AK, et al. (2014) Multi-tissue transcriptomics of the black widow spider reveals expansions, co-options, and functional processes of the silk gland gene toolkit. *BMC Genomics* 15: 365. doi:10.1186/1471-2164-15-365.
26. Zhao Y-J, Zeng Y, Chen L, Dong Y, Wang W (2013) Analysis of transcriptomes of three orb-web spider species reveals gene profiles involved in silk and toxin. *Insect Sci*: n/a–n/a. doi:10.1111/1744-7917.12068.
27. Sanggaard KW, Bechsgaard JS, Fang X, Duan J, Dyrland TF, et al. (2014) Spider genomes provide insight into composition and evolution of venom and silk. *Nat Commun* 5. Available: <http://www.nature.com/ncomms/2014/140506/ncomms4765/full/ncomms4765.html>. Accessed 9 July 2014.
28. Kanayama M, Akiyama-Oda Y, Nishimura O, Tarui H, Agata K, et al. (2011) Travelling and splitting of a wave of hedgehog expression involved in spider-head segmentation. *Nat Commun* 2: 500. doi:10.1038/ncomms1510.

29. Oda H, Nishimura O, Hirao Y, Tarui H, Agata K, et al. (2007) Progressive activation of Delta-Notch signaling from around the blastopore is required to set up a functional caudal lobe in the spider *Achaearanea tepidariorum*. *Dev Camb Engl* 134: 2195–2205. doi:10.1242/dev.004598.
